# Supplementary material for: SPATA18 Expression Predicts Favorable Clinical Outcome in Colorectal Cancer
Source: MDPI journal article supplement (doi:10.3390/ijms23052753), 2022-03-02
Supplement: s1 [file s1]

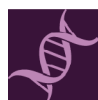

# Supplementary materials: SPATA18 expression predicts favorable clinical outcome in colorectal cancer

Akane Sugimura-Nagata, Akira Koshino, Kazuhiro Nagao, Aya Nagano, Masayuki Komura, Akane Ueki, Masahide Ebi, Naotaka Ogasawara, Toyonori Tsuzuki, Kenji Kasai, Satoru Takahashi, Kunio Kasugai, and Shingo Inaguma

**Supplementary Table S1.** Antibodies and conditions for immunohistochemistry

| Genes   | Reagent   | Dilution | Antibodies                                            |
|---------|-----------|----------|-------------------------------------------------------|
| CCNA    | IV        | 100      | sc-751, Santa Cruz Biothechnology, Inc. (Dallas, TX)  |
| GMNN    | OV        | 500      | EPR14637, Abcam (Cambridge, UK)                       |
| Ki-67   | OV        | 100      | Clone MIB-1, Dako/Agilent, (Santa Clara, CA)          |
| MLH1    | OV        | 200      | Clone G168-728, BD Biosciences, (Franklin Lakes, NJ)  |
| MSH2    | OV        | 200      | Clone G219-1129, BD Biosciences, (Franklin Lakes, NJ) |
| MSH6    | OV        | 400      | Clone 44/MSH6, BD Biosciences, (Franklin Lakes, NJ)   |
| SPATA18 | BM        | 1,000    | EPR13704, Abcam (Cambridge, UK)                       |
| TP53    | BM        | 500      | Clone DO7, Leica Biosystems (Wetzlar, Germany)        |
| PHH3    | BM        | 500      | Cell Marque™, Millipore SIGMA, (Rocklin, CA)          |
| PMS2    | OV+Linker | 50       | Clone A16-4, BD Biosciences, (Franklin Lakes, NJ)     |

BM, Leica BondMax; IV, Ventana iView reagent; OV, Ventana OptiView reagent. Antigen retrieval was performed with heat activation in high pH buffer.

**Supplementary Table S2.** Concordance rate of initial immunostaining evaluation

| Immunohistochemistry | Concordance Rate<br>(%) | k coefficient | 95% Confidence Interval |      |
|----------------------|-------------------------|---------------|-------------------------|------|
|                      |                         |               | Min                     | Max  |
| SPATA18              | 89.9                    | 0.75          | 0.67                    | 0.84 |

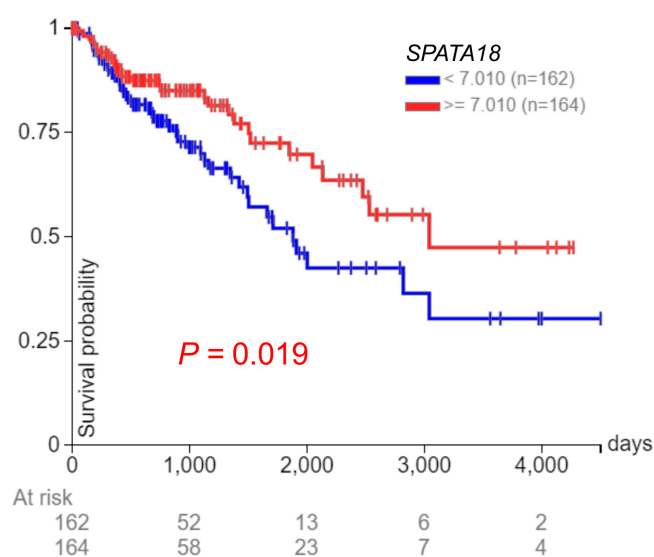

**Supplementary Figure S1. Overall survival of CRC cases according to *SPATA18* expression.** Kaplan-Meier curves for the patients grouped according to *SPATA18* expression levels. Note that patients with CRCs expressing *SPATA18* at lower levels showed significantly worse overall survival.

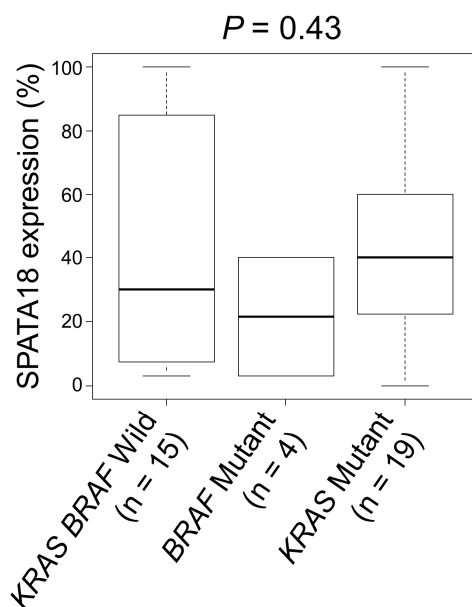

**Supplementary Figure S2. *SPATA18* expression in the tumors with or without gene mutation.** Note that no significant correlation was detected between *SPATA18* expression and *KRAS* or *BRAF* mutations.
